# Supplementary material
Source: PubMed Central journal article supplement (PMC11108304)

Figure S3

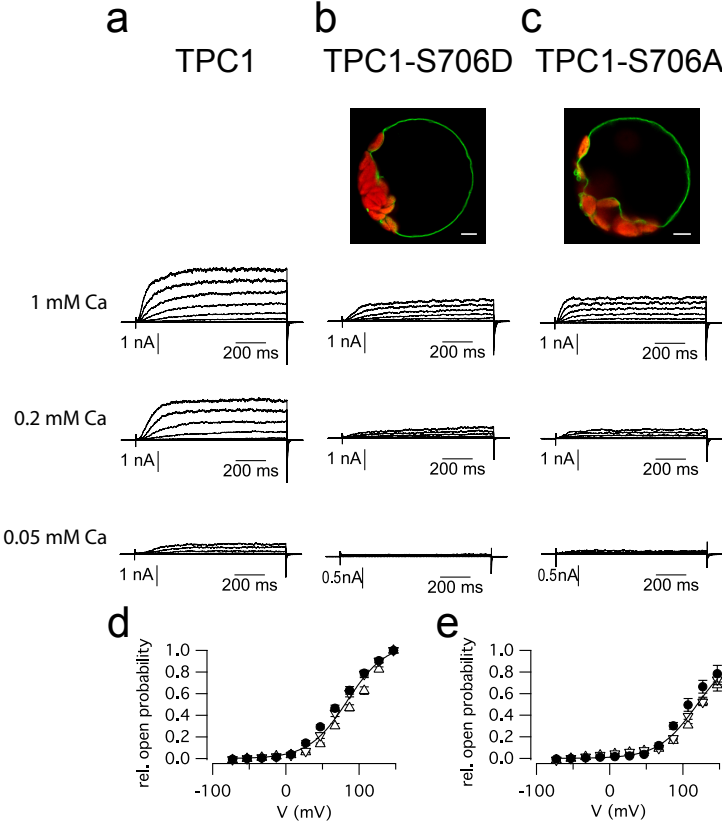

Supplement: 18_2016_2131_MOESM3_ESM.pdf [file 18_2016_2131_MOESM3_ESM.pdf]
